# Supplementary material for: Self‐Assembly of G‐Rich Oligonucleotides Incorporating a 3′–3′ Inversion of Polarity Site: A New Route Towards G‐Wire DNA Nanostructures
Source: PubMed Central journal article supplement — ChemistryOpen. 2017 Jun 13;6(4):599–605. doi: 10.1002/open.201700024 (PMC5542749; doi:10.1002/open.201700024), 2017-06-13
Supplement: OPEN-6-599-s001.pdf [file OPEN-6-599-s001.pdf]

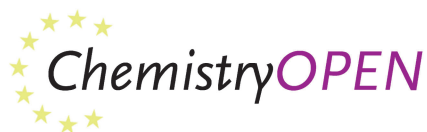

## Supporting Information

© 2017 The Authors. Published by Wiley-VCH Verlag GmbH & Co. KGaA, Weinheim

### **Self-Assembly of G-Rich Oligonucleotides Incorporating a 3'–3' Inversion of Polarity Site: A New Route Towards G-Wire DNA Nanostructures**

Giorgia Oliviero,<sup>[b]</sup> Stefano D'Errico,<sup>[a]</sup> Brunella Pinto,<sup>[a]</sup> Fabrizia Nici,<sup>[a]</sup> Principia Dardano,<sup>[c]</sup> Ilaria Rea,<sup>[c]</sup> Luca De Stefano,<sup>[c]</sup> Luciano Mayol,<sup>[a]</sup> Gennaro Piccialli,<sup>[a]</sup> and Nicola Borbone<sup>\*[a]</sup>

open\_201700024\_sm\_miscellaneous\_information.pdf

Supporting Information

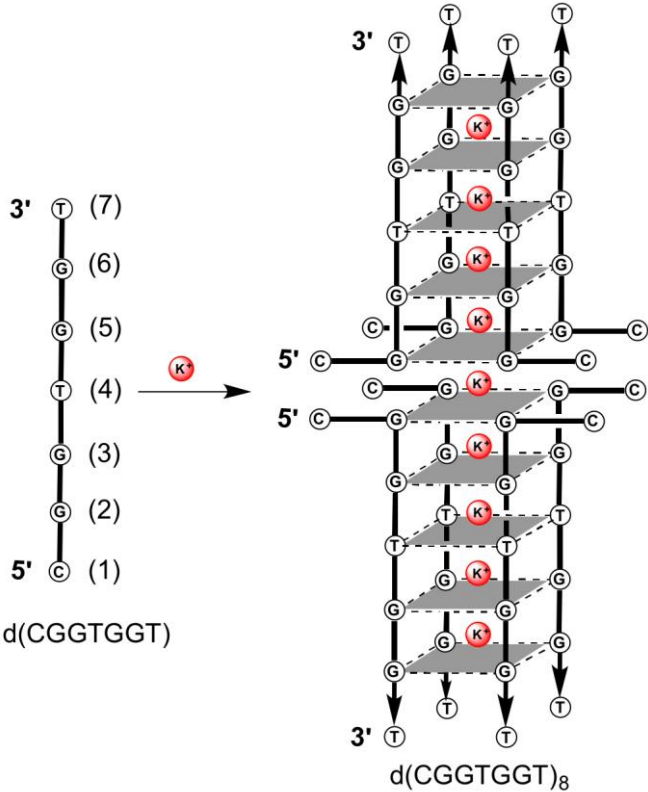

**Figure S1.** Schematic representations of single stranded ODN d(CGGTGGT) (a) and of its dimeric tetramolecular quadruplex assembly d(CGGTGGT)<sub>8</sub>.

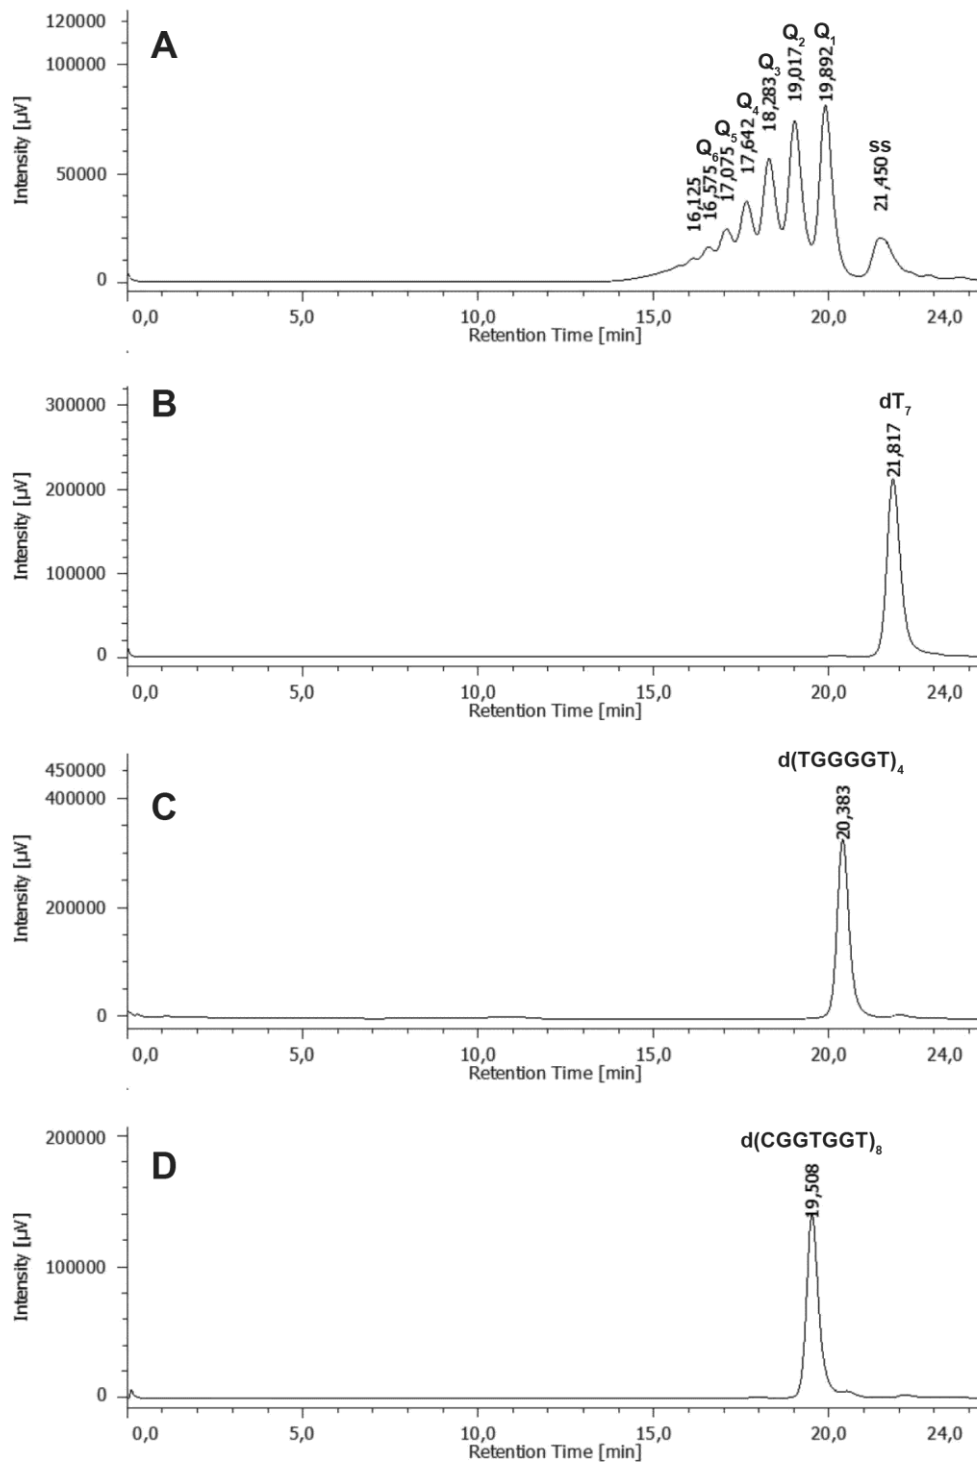

**Figure S2.** HPLC-SEC profiles of 0.1 mM **1** (A), dT<sub>7</sub> (B), d(TGGGGT)<sub>4</sub> (C) and d(CGGTGGT)<sub>6</sub> (D) annealed in 1.0 M K<sup>+</sup> buffer and stored at 4 °C for 24 h. ss = single strand.

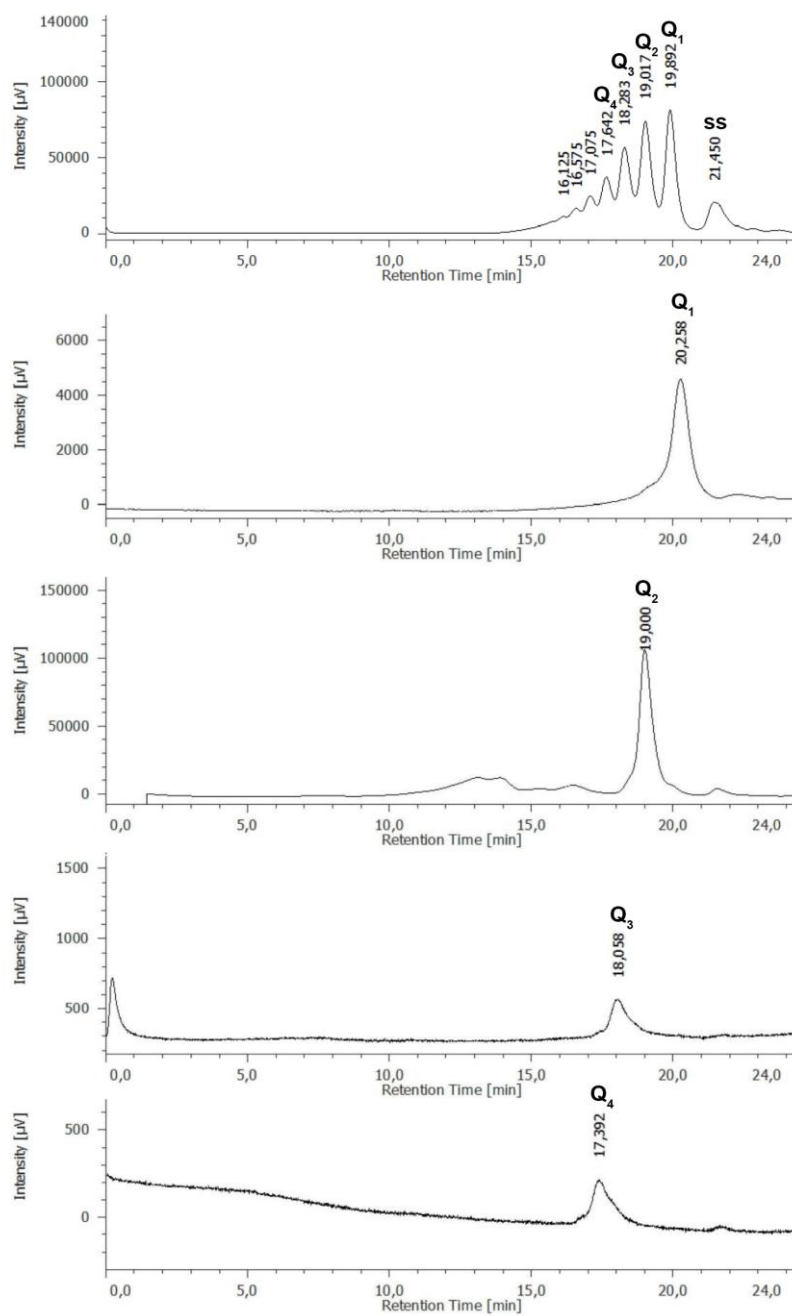

**Figure S3.** HPLC-SEC profiles of 0.1 mM **1** annealed in 1.0 M K<sup>+</sup> buffer and stored at 4 °C for 24 h and of Q<sub>1</sub>, Q<sub>2</sub>, Q<sub>3</sub> and Q<sub>4</sub> injected 24 h after their recovering from profile A (profiles B–E, respectively).

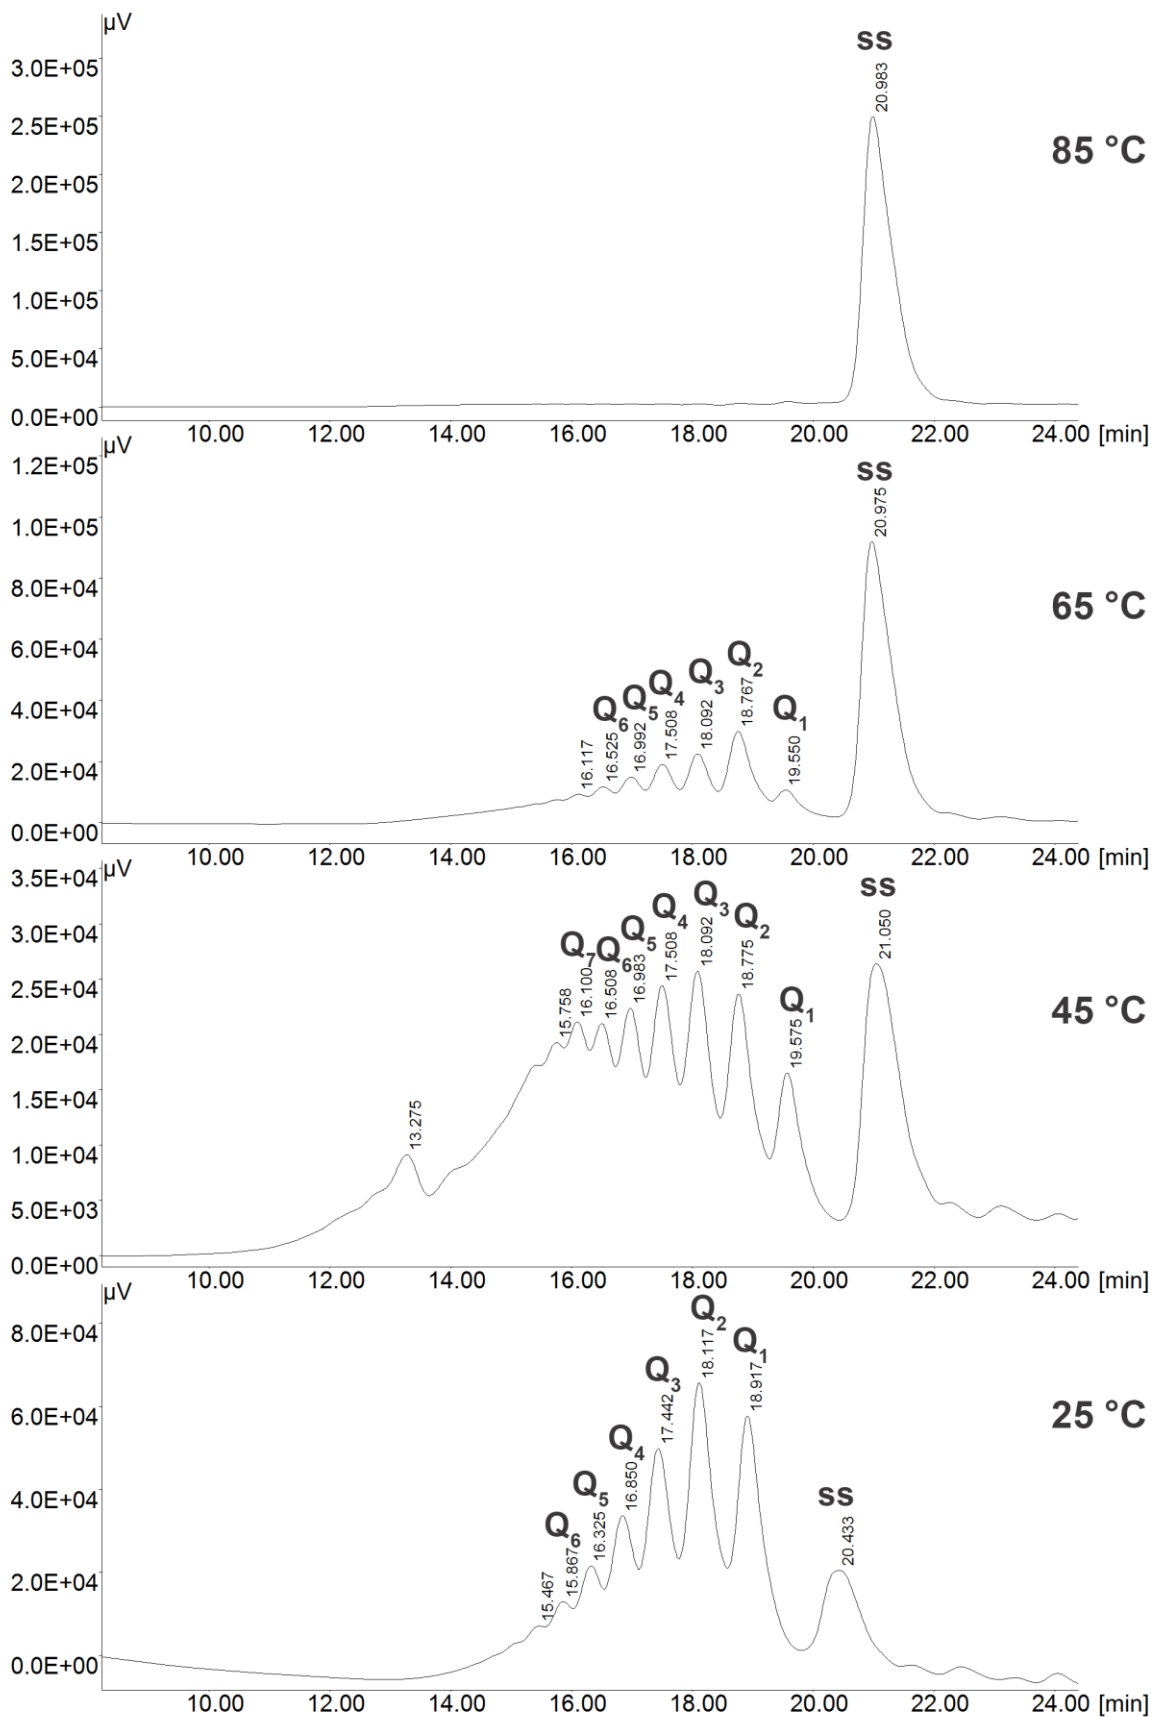

**Figure S4.** HPLC-SEC profiles of 0.1 mM **1** annealed in 1.0 M  $\text{K}^+$  buffer and stored at 4 °C for 24 h before being injected 30 min after heating at 25, 45, 65 and 85 °C.

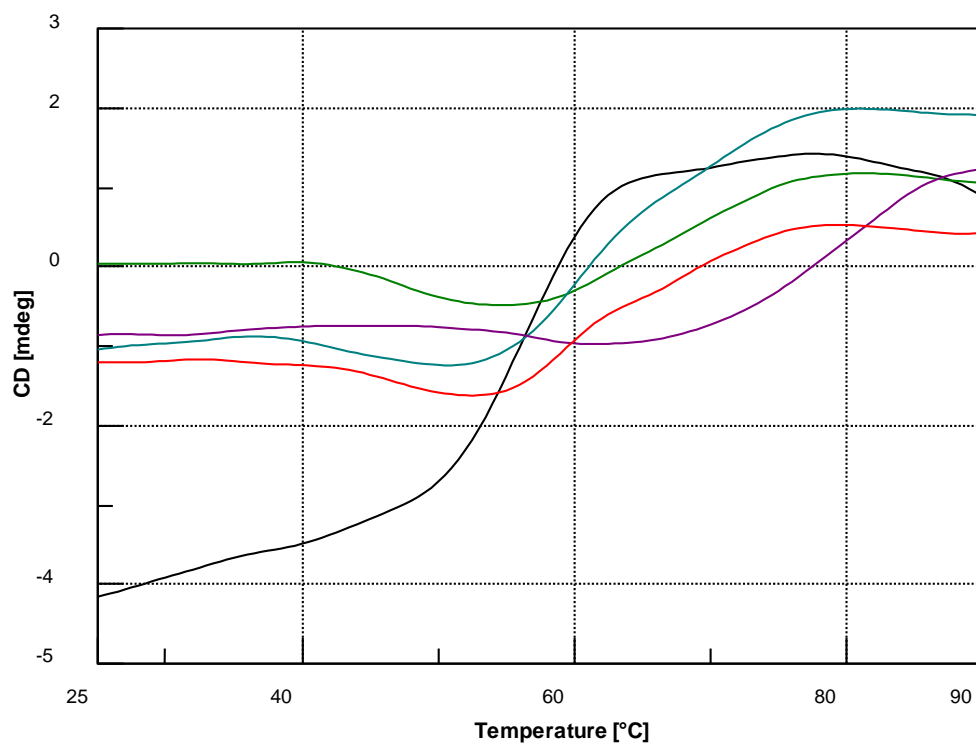

**Figure S5.** CD denaturation profiles of 0.1 mM **1** annealed in 1.0 M K<sup>+</sup> buffer (**Q<sub>n</sub>**, purple) and of the G-quadruplexes **Q<sub>1</sub>** (black), **Q<sub>2</sub>** (green), **Q<sub>3</sub>** (red) and **Q<sub>4</sub>** (cyan) isolated by HPLC-SEC from **Q<sub>n</sub>**. All curves were recorded at 268 nm, 24 h after isolation (for **Q<sub>1-4</sub>**) and storage at 4 °C

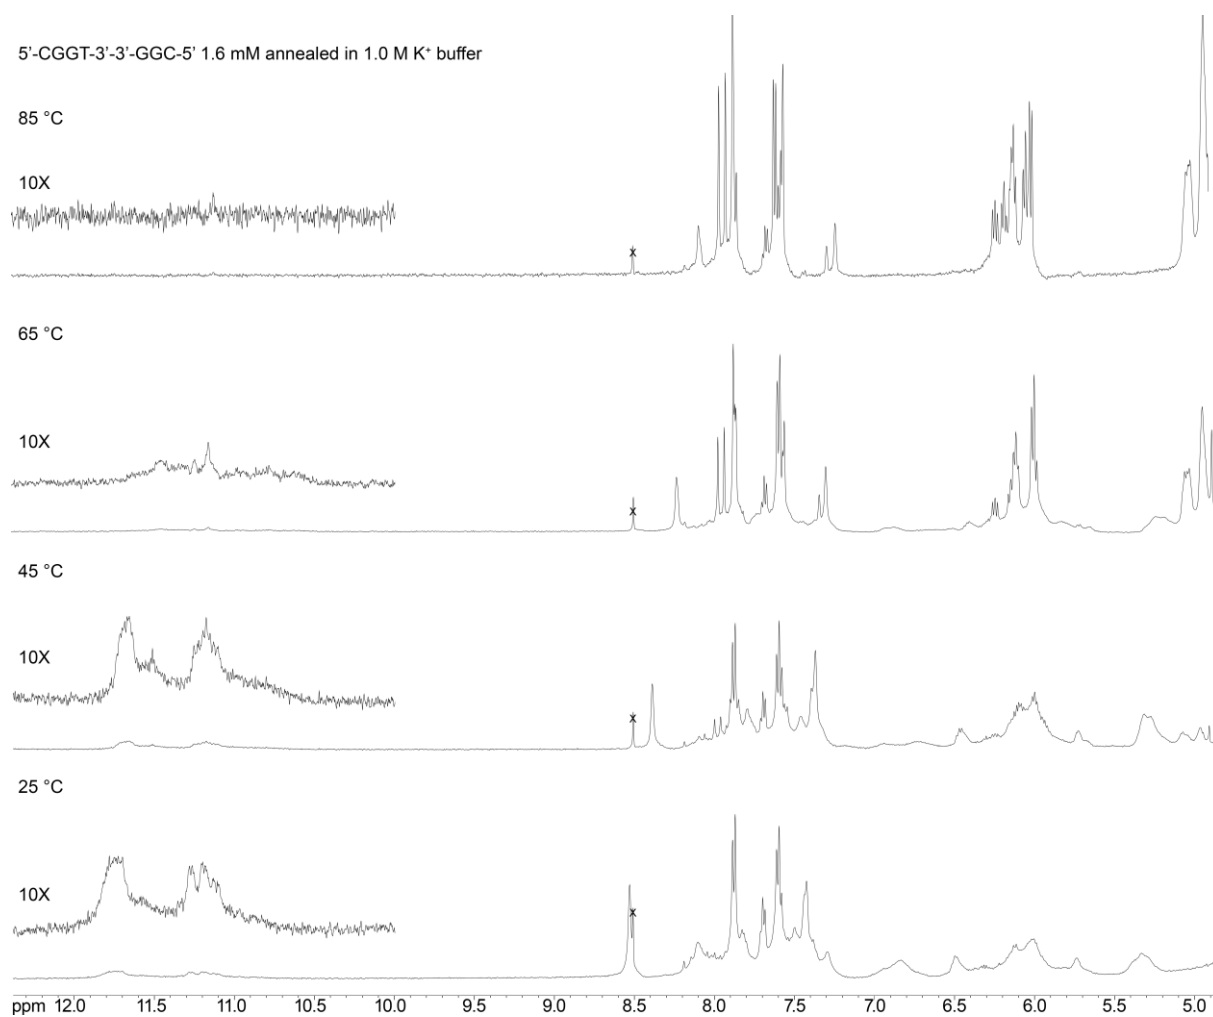

**Figure S6** Imino, aromatic and anomeric protons regions of <sup>1</sup>H NMR spectra of 1.6 mM **1** annealed in 1 M K<sup>+</sup> buffer and recorded at 25, 45, 65 and 85 °C. The insets show the imino proton regions at 10× magnification.
